# Supplementary material
Source: PubMed Central journal article supplement (PMC3043280)
Supplement: supp_dyq164_IJE_administrative_forms.pdf [file supp_dyq164_IJE_administrative_forms.pdf]

**Check list for re-submissions** - please tick to show inclusion and return it with your paper

- Two copies of revised version of paper, one of which is marked for changes. **The clean version should be uploaded as Main Body, the tracked version, as Supplementary Material.**
- Detailed letter explaining how you have responded to each of the referees comments.
- Word count on title page (for paper plus abstract but not including tables)
- Supply Medical Subject Headings (Medline / MeSH)
- Identify an author for correspondence, with full name, title, address, phone, fax and e-mail address
- Include a brief, succinct title for each table and figure and an abstract meeting the required IJE format
- Acknowledgements including details regarding source of funding and confirmation that those acknowledged have confirmed their agreement.
- References prepared in the Vancouver Style (see eg *Br Med J* 1982;**284**:1766-76 ).
- A statement regarding any conflicts of interest (e.g. financial support from a group who will gain from the publication of the paper) the authors have.
- A statement signed by each author regarding the authorship criteria which each has fulfilled (what has each author contributed to this paper?)
- A statement from the lead author saying that the references have been checked for accuracy and completeness
- A statement as to which author (not necessarily the first author) will act as guarantor for the paper – i.e. who will personally vouch for its validity  
**I-Min Lee will act as guarantor**
- Include written permission from the source for each “personal communication” you cite  
N/A
- Confirmation that this material has not been published previously in a substantively similar form
- Confirmation that the manuscript has been carefully edited by someone with an excellent mastery of the English language.

# International Journal of Epidemiology

## Authorship of Papers

We need to be sure that all authors of IJE papers meet the criteria of authorship agreed by the International Committee of Medical Journal Editors (see [www.icmje.org](http://www.icmje.org)). We also want to be sure that there is no-one who meets such criteria who is not listed as an author.

Please therefore read the criteria listed below and sign and return the form.

“Each author should have participated sufficiently in the work to take public responsibility for the content. Authorship credit should be based only on substantial contributions to a) conception and design, or analysis and interpretation of data; and b) drafting the article or revising it critically for important intellectual content; and c) final approval of the version to be published. Conditions a), b), and c) must all be met. Participation solely in the acquisition of funding or the collection of data does not justify authorship. General supervision of the research group is not sufficient for authorship.”

---

No. of Paper: IJE-2010-04-0408

Title: Prospective cohort study of breast implants and the risk of connective-tissue diseases

All the authors listed on this paper meet the criteria set down by the International Committee of Medical Journal Editors and have seen and approved the final manuscript. No-one who might consider that he or she has a right to be an author has been excluded.

Name

Signature

I-Min Lee    a, b, c   

I-Min Lee 10 Aug 10

Nancy Cook    a b c   

Nancy R. Cook 8/10/10

Nancy Shadick                     

Eduardo Pereira    a b c   

Eduardo C. P. 08/10/10

Julie Buring    a b c   

Julie Buring 08/12/10

                                    

                                    

                                    

                                    

                                    

                                    

Corresponding author:

I-Min Lee

# International Journal of Epidemiology

## Authorship of Papers

We need to be sure that all authors of IJE papers meet the criteria of authorship agreed by the International Committee of Medical Journal Editors (see [www.icmje.org](http://www.icmje.org)). We also want to be sure that there is no-one who meets such criteria who is not listed as an author.

Please therefore read the criteria listed below and sign and return the form.

“Each author should have participated sufficiently in the work to take public responsibility for the content. Authorship credit should be based only on substantial contributions to a) conception and design, or analysis and interpretation of data; and b) drafting the article or revising it critically for important intellectual content; and c) final approval of the version to be published. Conditions a), b), and c) must all be met. Participation solely in the acquisition of funding or the collection of data does not justify authorship. General supervision of the research group is not sufficient for authorship.”

---

No. of Paper: IJE-2010-04-0408

Title: Prospective cohort study of breast implants and the risk of connective-tissue diseases

All the authors listed on this paper meet the criteria set down by the International Committee of Medical Journal Editors and have seen and approved the final manuscript. No-one who might consider that he or she has a right to be an author has been excluded.

Name

Signature

I-Min Lee a, b, c

\_\_\_\_\_

Nancy Cook \_\_\_\_\_

\_\_\_\_\_

Nancy Shadick a, b, c



Eduardo Pereira \_\_\_\_\_

\_\_\_\_\_

Julie Buring \_\_\_\_\_

\_\_\_\_\_

\_\_\_\_\_

\_\_\_\_\_

\_\_\_\_\_

\_\_\_\_\_

Corresponding author:

I-Min Lee \_\_\_\_\_

# Conflict of Interest

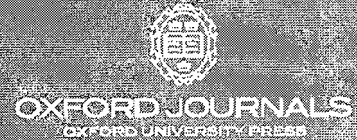

COI 0506

## International Journal of Epidemiology

Prospective Cohort Study of Breast Implants

Article title: and the Risk of Connective Tissue Diseases

Author: I-MIN LEE

Ms number: IJE-2010-04 -

(Note: each author must complete a separate form and return it to the corresponding author)

0408

Dear Author

*IJE* policy requires that all authors of all manuscripts sign a statement revealing (1) any financial interest in or arrangement with a company whose product was used in a study or is referred to in a manuscript; (2) any financial interest in or arrangement with a competing company, (3) any direct payment to an author(s) from any source for the purpose of writing the manuscript, and (4) any other financial connections, direct or indirect, or other situations that might raise the question of bias in the work reported or the conclusions, implications, or opinions stated—including pertinent commercial or other sources of funding for the individual author(s) or for the associated department(s) or organization(s), personal relationships, or direct academic competition. If the manuscript is published, such information may be communicated in a note following the text and references.

Please complete **Part A** or **Part B**.

### A. Conflict of interest statement. (Sample statement)

I hold stock in [business name], the makers of [product], and am currently conducting research sponsored by this company. I am also a member of the speakers' bureau for [business name].

**My statement is as follows:** \_\_\_\_\_

\_\_\_\_\_

\_\_\_\_\_

Printed name: \_\_\_\_\_

Signature: \_\_\_\_\_ Date: \_\_\_\_\_

### B. I have had no involvements that might raise the question of bias in the work reported or in the conclusions, implications, or opinions stated.

Printed name: I-MIN LEE

Signature:  Date: 7/6/10

# Conflict of Interest

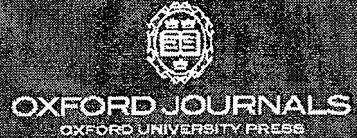

COI\_0506

## International Journal of Epidemiology

Prospective Cohort Study of Breast Implants

Article title: and the Risk of Connective Tissue Diseases

Author: Nancy R. Cook

Ms number: IJE-2010-04 -

(Note: each author must complete a separate form and return it to the corresponding author)

0408

Dear Author

IJE policy requires that all authors of all manuscripts sign a statement revealing (1) any financial interest in or arrangement with a company whose product was used in a study or is referred to in a manuscript; (2) any financial interest in or arrangement with a competing company, (3) any direct payment to an author(s) from any source for the purpose of writing the manuscript, and (4) any other financial connections, direct or indirect, or other situations that might raise the question of bias in the work reported or the conclusions, implications, or opinions stated—including pertinent commercial or other sources of funding for the individual author(s) or for the associated department(s) or organization(s), personal relationships, or direct academic competition. If the manuscript is published, such information may be communicated in a note following the text and references.

Please complete Part A or Part B.

### A. Conflict of interest statement. (Sample statement)

I hold stock in [business name], the makers of [product], and am currently conducting research sponsored by this company. I am also a member of the speakers' bureau for [business name].

My statement is as follows:

Printed name: \_\_\_\_\_

Signature: \_\_\_\_\_

Date: \_\_\_\_\_

**B. I have had no involvements that might raise the question of bias in the work reported or in the conclusions, implications, or opinions stated.**

Printed name: Nancy R. Cook

Signature: Nancy R. Cook

Date: 7/6/10

# Conflict of Interest

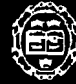

OXFORD JOURNALS  
OXFORD UNIVERSITY PRESS

## International Journal of Epidemiology

Article title: Prospective cohort study of breast implants and the risk of connective tissue disease

Author: Nancy Shadick

Ms number: IJE 2010 04 0408

(Note: each author must complete a separate form and return it to the corresponding author)

Dear Author

*IJE* policy requires that all authors of all manuscripts sign a statement revealing (1) any financial interest in or arrangement with a company whose product was used in a study or is referred to in a manuscript; (2) any financial interest in or arrangement with a competing company, (3) any direct payment to an author(s) from any source for the purpose of writing the manuscript, and (4) any other financial connections, direct or indirect, or other situations that might raise the question of bias in the work reported or the conclusions, implications, or opinions stated—including pertinent commercial or other sources of funding for the individual author(s) or for the associated department(s) or organization(s), personal relationships, or direct academic competition. If the manuscript is published, such information may be communicated in a note following the text and references.

Please complete Part A or Part B.

### A. Conflict of interest statement. (Sample statement)

I hold stock in [business name], the makers of [product], and am currently conducting research sponsored by this company. I am also a member of the speakers' bureau for [business name].

My statement is as follows:

Printed name: \_\_\_\_\_

Signature: \_\_\_\_\_ Date: \_\_\_\_\_

**B. I have had no involvements that might raise the question of bias in the work reported or in the conclusions, implications, or opinions stated.**

Printed name: Nancy Shadick

Signature: [Signature] Date: 7/6/10

# Conflict of Interest

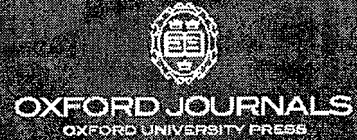

COI\_0506

## International Journal of Epidemiology

Prospective Cohort Study of Breast Implants

Article title: and the Risk of Connective Tissue Diseases

Author: Eduardo Pereira

Ms number: IJE-2010-04 -

(Note: each author must complete a separate form and return it to the corresponding author)

0408

Dear Author

IJE policy requires that all authors of all manuscripts sign a statement revealing (1) any financial interest in or arrangement with a company whose product was used in a study or is referred to in a manuscript; (2) any financial interest in or arrangement with a competing company, (3) any direct payment to an author(s) from any source for the purpose of writing the manuscript, and (4) any other financial connections, direct or indirect, or other situations that might raise the question of bias in the work reported or the conclusions, implications, or opinions stated—including pertinent commercial or other sources of funding for the individual author(s) or for the associated department(s) or organization(s), personal relationships, or direct academic competition. If the manuscript is published, such information may be communicated in a note following the text and references.

Please complete Part A or Part B.

### A. Conflict of interest statement. (Sample statement)

I hold stock in [business name], the makers of [product], and am currently conducting research sponsored by this company. I am also a member of the speakers' bureau for [business name].

**My statement is as follows:**

Printed name: \_\_\_\_\_

Signature: \_\_\_\_\_ Date: \_\_\_\_\_

**B. I have had no involvements that might raise the question of bias in the work reported or in the conclusions, implications, or opinions stated.**

Printed name: EDUARDO C. PEREIRA

Signature: Eduardo C. Pereira Date: JULY 6<sup>TH</sup> 2010

# Conflict of Interest

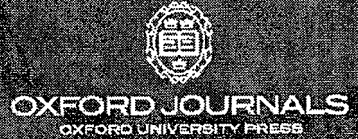

COI\_0506

## International Journal of Epidemiology

Prospective Cohort Study of Breast Implants

Article title: and the Risk of Connective Tissue Diseases

Author: Julie Buring

Ms number: IJE-2010-04 -

(Note: each author must complete a separate form and return it to the corresponding author)

0408

Dear Author

IJE policy requires that all authors of all manuscripts sign a statement revealing (1) any financial interest in or arrangement with a company whose product was used in a study or is referred to in a manuscript; (2) any financial interest in or arrangement with a competing company, (3) any direct payment to an author(s) from any source for the purpose of writing the manuscript, and (4) any other financial connections, direct or indirect, or other situations that might raise the question of bias in the work reported or the conclusions, implications, or opinions stated—including pertinent commercial or other sources of funding for the individual author(s) or for the associated department(s) or organization(s), personal relationships, or direct academic competition. If the manuscript is published, such information may be communicated in a note following the text and references.

Please complete Part A or Part B.

### A. Conflict of interest statement. (Sample statement)

I hold stock in [business name], the makers of [product], and am currently conducting research sponsored by this company. I am also a member of the speakers' bureau for [business name].

**My statement is as follows:** \_\_\_\_\_  
\_\_\_\_\_  
\_\_\_\_\_

Printed name: \_\_\_\_\_

Signature: \_\_\_\_\_ Date: \_\_\_\_\_

**B. I have had no involvements that might raise the question of bias in the work reported or in the conclusions, implications, or opinions stated.**

Printed name: JULIE BURING

Signature: Julie Buring Date: 7/6/10
